# Supplementary material for: Structural basis of NINJ1-mediated plasma membrane rupture in cell death
Source: PubMed Central journal article supplement (PMC10307626; doi:10.1038/s41586-023-05991-z), 2023-05-17
Supplement: 41586_2023_5991_MOESM1_ESM.pdf [file 41586_2023_5991_MOESM1_ESM.pdf]

**Supplementary information**

---

**Structural basis of NINJ1-mediated plasma membrane rupture in cell death**

---

In the format provided by the  
authors and unedited

**Supplementary Table 1. Summary of MD simulations**

| <b>Simulation system</b>                                                                                                                     | <b>Resolution</b> | <b>Simulation times</b>                            |
|----------------------------------------------------------------------------------------------------------------------------------------------|-------------------|----------------------------------------------------|
| <i>Stability of filaments &amp; rings</i>                                                                                                    |                   |                                                    |
| Double filament 2x10 hNINJ1 <sub>39-152</sub>                                                                                                | CG                | 50 $\mu$ s, 50 $\mu$ s                             |
| Double filament 2x10 hNINJ1 <sub>39-152</sub> , with DDM                                                                                     | CG                | 50 $\mu$ s, 50 $\mu$ s                             |
| Single filaments at membrane patch 2x10 hNINJ1 <sub>39-152</sub>                                                                             | CG                | 20 $\mu$ s, 20 $\mu$ s                             |
| Single filaments at membrane patch 2x5 hNINJ1 <sub>39-152</sub>                                                                              | AA                | 1 $\mu$ s, 1 $\mu$ s                               |
| Single filament in solution, restrained helices $\alpha$ 3 & $\alpha$ 4, AlphaFold2 shape of $\alpha$ 1+ $\alpha$ 2 hNINJ1 <sub>39-152</sub> | AA                | 1 $\mu$ s                                          |
| 45-er ring hNINJ1 <sub>39-152</sub>                                                                                                          | CG                | 150 $\mu$ s, 150 $\mu$ s, 150 $\mu$ s, 150 $\mu$ s |
| 45-er ring hNINJ1 <sub>76-152</sub> (helices $\alpha$ 3 & $\alpha$ 4 only)                                                                   | CG                | 150 $\mu$ s, 150 $\mu$ s, 150 $\mu$ s              |
|                                                                                                                                              |                   |                                                    |
| <i>Membrane binding of the N-terminus</i>                                                                                                    |                   |                                                    |
| Monomeric hNINJ1 <sub>20-152</sub> , asymmetric membrane                                                                                     | CG                | 10x40 $\mu$ s                                      |
| Monomeric hNINJ1 <sub>20-152</sub> , symmetric membrane                                                                                      | CG                | 10x40 $\mu$ s                                      |

**Supplementary Table 2. Analysis of NINJ1 evolutionary couplings.<sup>a</sup>**

| Pair number | Residue 1 | Residue 2 | Probability | Score | d <sub>C<math>\alpha</math>-C<math>\alpha</math></sub> inter [Å] | d <sub>C<math>\alpha</math>-C<math>\alpha</math></sub> intra [Å] |
|-------------|-----------|-----------|-------------|-------|------------------------------------------------------------------|------------------------------------------------------------------|
| 1           | G95       | F127      | 98.7        | 4.35  | 8.5                                                              | 12.4                                                             |
| 2           | S46       | V102      | 91.6        | 2.38  | 11.9                                                             | 14.9                                                             |
| 3           | K44       | G95       | 77.4        | 1.23  | 8.0                                                              | 16.5                                                             |
| 4           | N107      | H112      | 75.0        | 1.1   | 9.8                                                              | 10.8                                                             |
| 5           | M51       | F127      | 68.2        | 0.76  | 6.1                                                              | 20.2                                                             |
| 6           | I54       | G124      | 66.7        | 0.7   | 11.1                                                             | 16.8                                                             |
| 7           | S43       | V102      | 64.9        | 0.62  | 7.5                                                              | 17.5                                                             |
| 8           | I92       | I128      | 63.8        | 0.56  | 8.5                                                              | 12.9                                                             |
| 9           | K103      | N120      | 62.5        | 0.51  | 8.8                                                              | 17.6                                                             |

<sup>a</sup>All evolutionary couplings among the 100 with highest score that have a closer spatial proximity for intermolecular distance than the intramolecular distance. See Methods for details

**Fig. 1a**

Order of antibody incubation (all in the same membrane):  
 1) anti-NINJ1  
 2) anti-GSDMD  
 3) anti-Tubulin

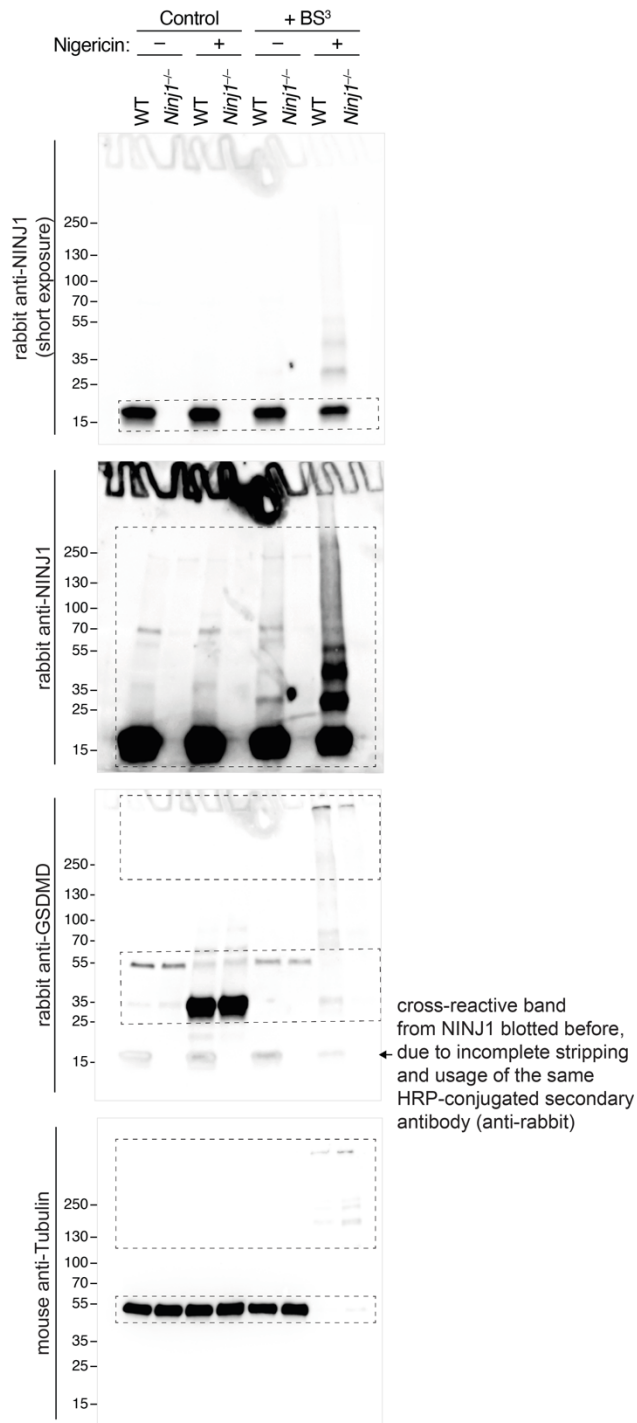

**Fig. 1b**

Order of antibody incubation (all in the same membrane):  
 1) anti-NINJ1  
 2) anti-GSDMD  
 3) anti-Tubulin

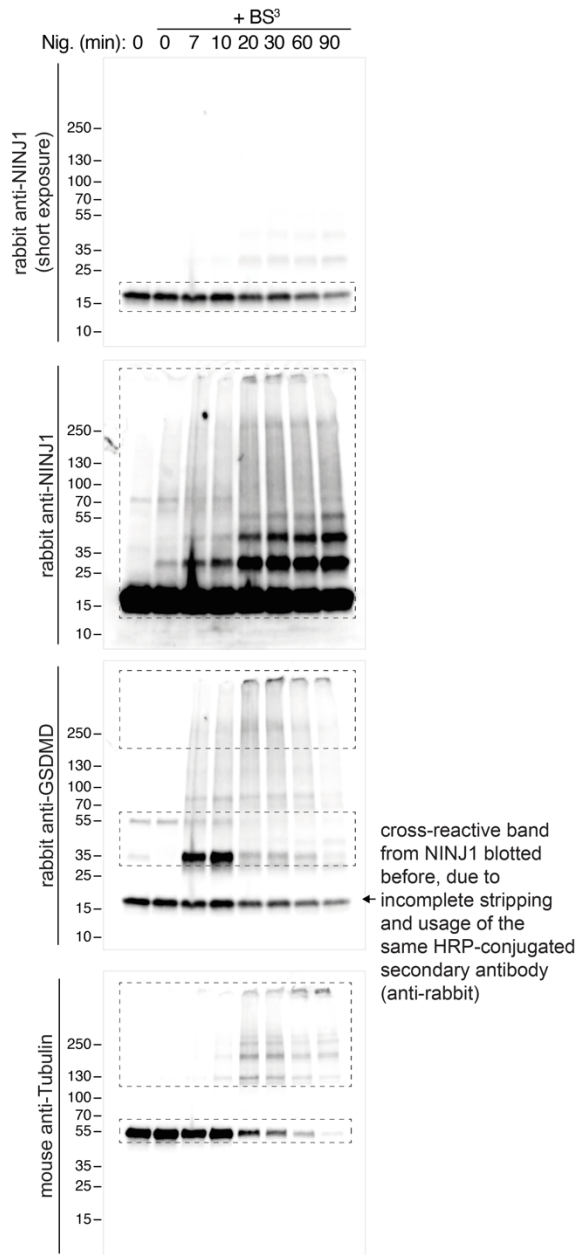

**Supplementary Figure 1. Uncropped gels of Figure 1.**

### ED 1c

Order of antibody incubation (all in the same membrane):  
 1) anti-NINJ1  
 2) anti-Tubulin

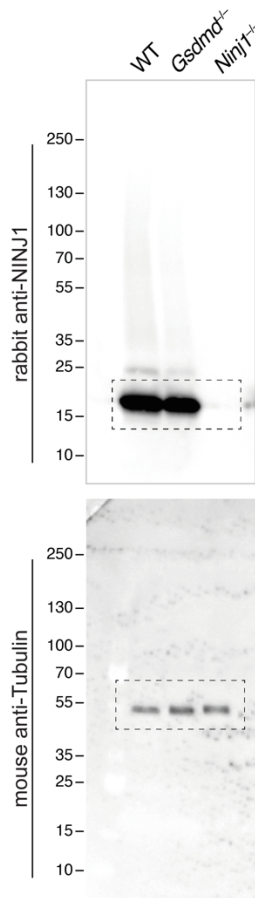

### ED 1e

Order of antibody incubation (all in the same membrane):  
 1) anti-NINJ1 (not shown. Done to validate knock-out cells)  
 2) anti-GSDMD  
 3) anti-Tubulin

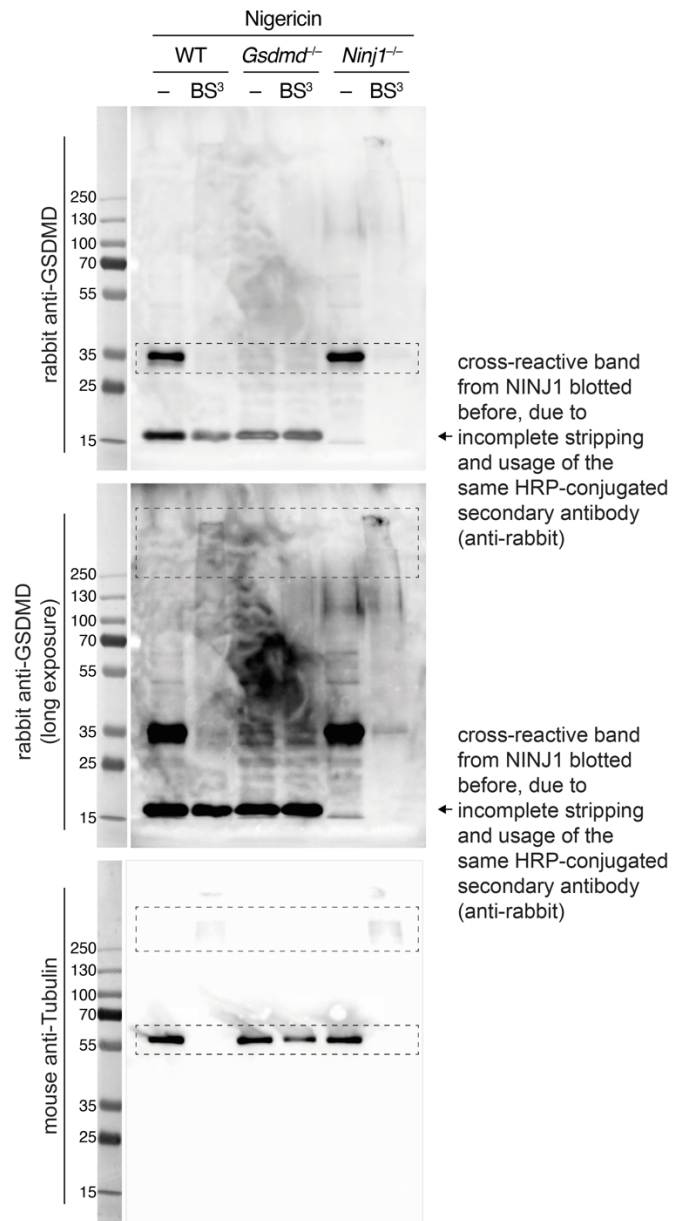

Supplementary Figure 2. Uncropped gels of Extended Data Figure 1.

## ED 5c

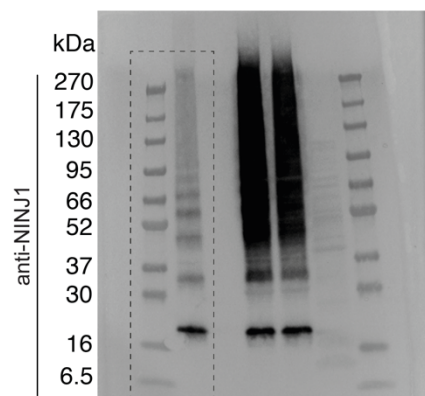

**Supplementary Figure 3.** Uncropped gel of Extended Data Figure 5.

### ED 8b

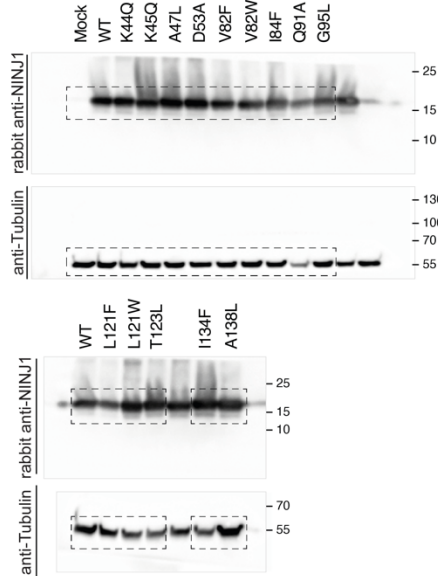

### ED 8e

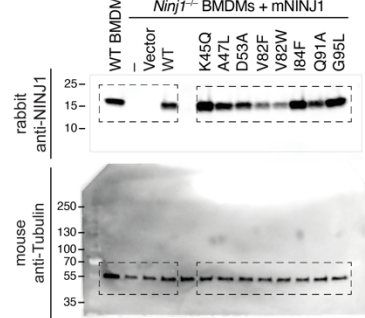

### ED 8f

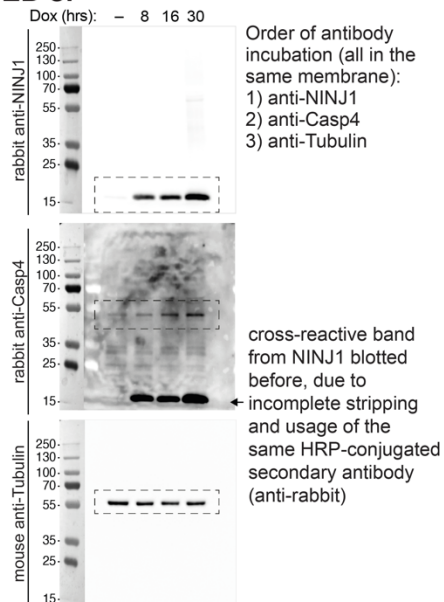

### ED 8h

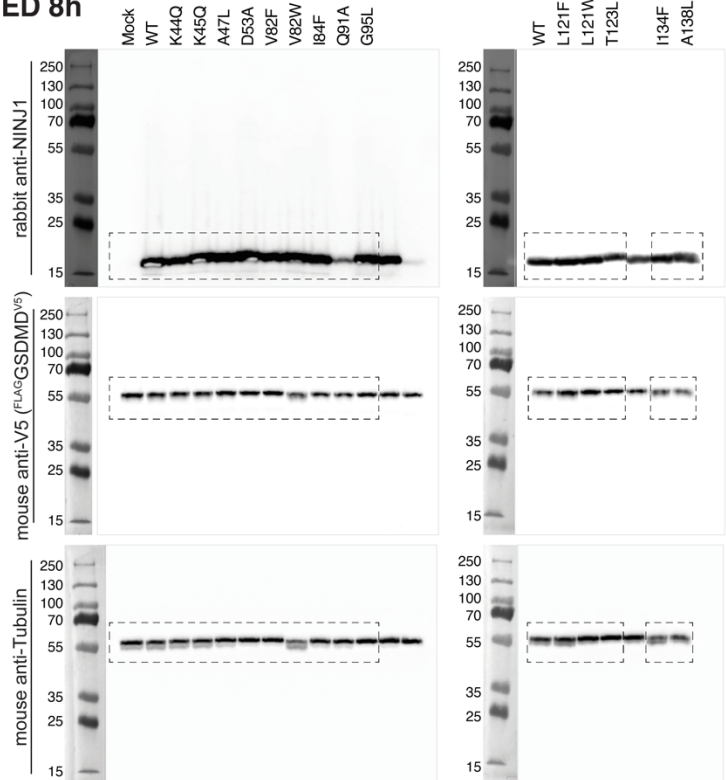

### ED 8i

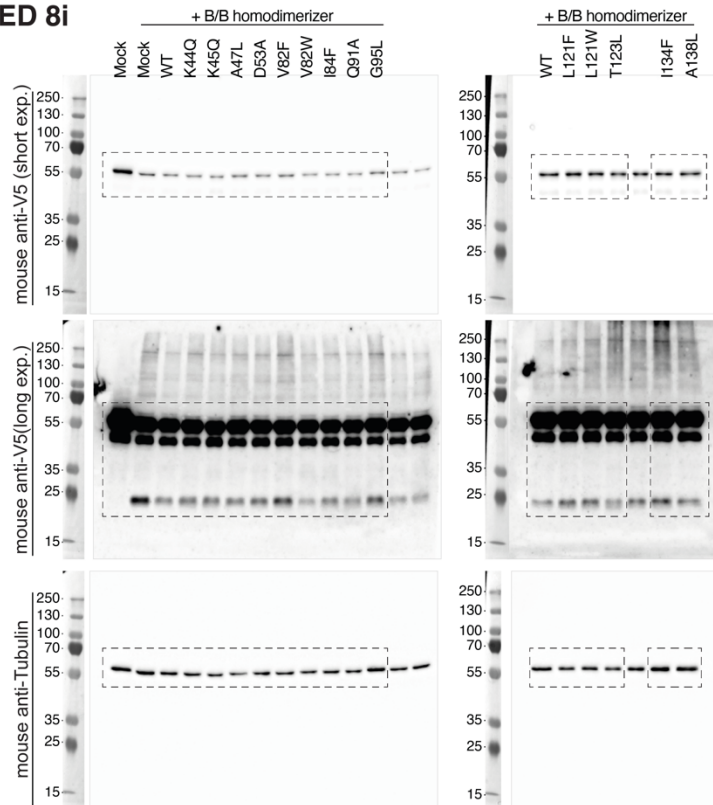

Supplementary Figure 4. Uncropped gels of Extended Data Figure 8.
